# Supplementary material for: Functionalised gold and titania nanoparticles and surfaces for use as antimicrobial coatings
Source: Royal Society of Chemistry journal article supplement (doi:10.1039/c4fd00113c), 2014-01-01
Supplement: c4fd00113c1.pdf [file c4fd00113c1.pdf]

## Supplementary Information

**Table 1:** EDX data for TiO<sub>2</sub> samples

| Spectrum 1 | Line Type | k factor | Absorption Correction | Wt%    | Wt% Sigma | Atomic % |
|------------|-----------|----------|-----------------------|--------|-----------|----------|
| O          | K series  | 1.181    | 1.00                  | 47.29  | 0.32      | 72.87    |
| Ti         | K series  | 0.635    | 1.00                  | 52.71  | 0.32      | 27.13    |
| Total      |           |          |                       | 100.00 |           | 100.00   |

**Table 2:** EDX data for Au/TiO<sub>2</sub> samples

| Spectrum 1 | Line Type | k factor | Absorption Correction | Wt%   | Wt% Sigma | Atomic % |
|------------|-----------|----------|-----------------------|-------|-----------|----------|
| O          | K series  | 1.181    | 1                     | 51.61 | 0.64      | 77       |
| Ti         | K series  | 0.635    | 1                     | 45.45 | 0.61      | 22.65    |
| Au         | M series  | 1.012    | 1                     | 2.94  | 0.6       | 0.36     |
| Total      |           |          |                       | 100   |           | 100      |

**Table 3:** Nanoparticle composition data from XPS measurements

| Sample              | Sample Description          | Titanium Content (at. %) | Oxygen Content (at. %) | Au (gold) Content (at. %) |
|---------------------|-----------------------------|--------------------------|------------------------|---------------------------|
| TiO <sub>2</sub>    | Unmodified TiO <sub>2</sub> | 22.4                     | 62.05                  | -                         |
| Au/TiO <sub>2</sub> | Gold-doped TiO <sub>2</sub> | 20.54                    | 53.24                  | 0.51                      |

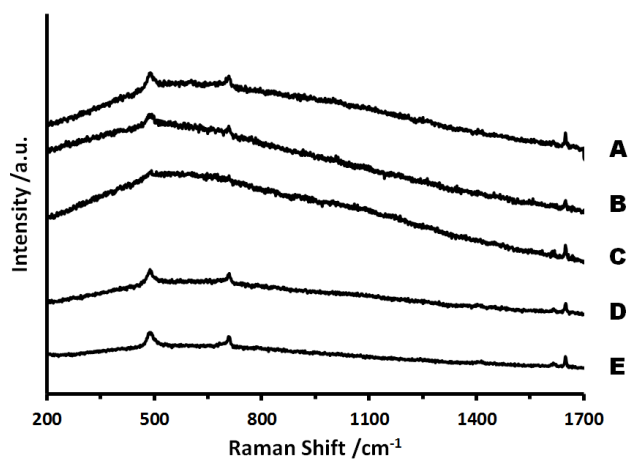

**Figure 1:** Raman spectra of: a) control solvent-treated silicone, b) TiO<sub>2</sub>-encapsulated silicone, c) TiO<sub>2</sub>-encapsulated silicone irradiated with UV light (365 nm, 18 h), d) Au/TiO<sub>2</sub>-encapsulated silicone and e) TiO<sub>2</sub>-encapsulated silicone irradiated with UV light (365 nm, 18 h)
